# Supplementary material
Source: publisher figshare collection journal article supplement (https://springernature.figshare.com/ndownloader/files/20078135)
Supplement: Supplementary file [file 20078135]

**Additional file 6.**

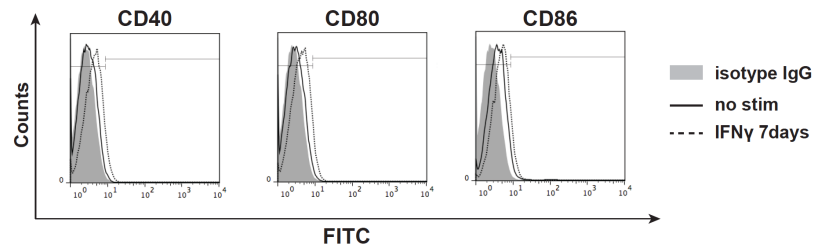

**Surface expression of costimulatory molecules. Related to Figures 2 and 3.**

No significant expression of CD80 or CD86 could be detected in resting or IFN $\gamma$ -stimulated hfcMSCs, which corroborates the absence of expression at the mRNA level. Although the mRNA expression of CD40 was increased upon IFN $\gamma$  stimulation, no significant corresponding upregulation of surface expressed protein could be detected.
